# Supplementary material for: Implementing a Lung Cancer Detection and Navigation Program in the Antelope Valley: Improving Timeliness, Utilization, and Outcomes in a Low-resource Community
Source: Research Square preprint supplement (doi:10.21203/rs.3.rs-7419217/v1), 2025-09-22
Supplement: Supplementary file 1 [file 59f5177269d9f3000f059c71.docx]

**Supplementary Information**

**Implementing a Lung Cancer Detection and Navigation Program in the Antelope Valley: Improving Timeliness, Utilization and Outcomes in a Low-resource Community**

Dan J. Raz, MD, MAS1,*; Africa Robison2; Anjaney Kothari, PhD1; J. Mark Erfe, MD, MPH1; Christy Monteith, RN, MSN, FNP-C, OCN3; Amartej Merla, MD4; Loretta Erhunmwunsee, MD1; Tanyanika Phillips, MD, MPH4

1Division of Thoracic Surgery, Department of Surgery, City of Hope National Medical Center, Duarte, California, USA

2Sheri and Les Biller Patient and Family Resource Center, Department of Supportive Care Medicine, City of Hope National Medical Center, Duarte, California, USA

3Antelope Valley Medical Center, Lancaster, California, USA

4Department of Medical Oncology and Developmental Therapeutics, City of Hope National Medical Center, Duarte, California, USA

*Corresponding Author:

Dan J. Raz, MD, MAS

Professor

Division of Thoracic Surgery, Department of Surgery

City of Hope National Medical Center, 1500 E Duarte Road, Duarte, CA 91010

Phone: +1-626-218-7100; Email: draz@coh.org

**Table S1. Questionnaire used by the lung cancer navigator to conduct needs assessment for enrolled patients.**

| **Transportation** |  |
| --- | --- |
| Do you have any concerns about getting a ride to any of your upcoming medical appointments? | - Yes - No |
| Transportation notes |  |
|  | |
| **Internet access** |  |
| Which of the following devices do you have access to at home? | - Computer (desktop or laptop) - Tablet (such as iPad) - Smartphone where you can browse the internet |
| Do you have access to reliable internet at home? | - Yes - No |
| Would you be interested in borrowing an internet-enabled laptop computer for telehealth appointments?* | - Yes - No - Not applicable (has internet/device) |
| [City of Hope patients only] Have you signed up for the City of Hope patient portal? | - Yes - No - Not applicable (non-COH) |
| Internet access comments |  |
|  | |
| **Financial concerns** |  |
| Are you concerned about being able to pay for your medical care? | - Yes - No |
| Would you like to speak to one of our financial counselors? | - Yes - No |
| Financial concerns comment |  |
|  | |
| **Psychosocial needs** |  |
| Would you consider where you are currently living to be temporary, such as staying with a friend or relative, a hotel or motel, group home, shelter, or vehicle? | - Yes - No |
| Comments on current living situation |  |
| Are you worried about how you are going to pay your rent or mortgage? | - Yes - No |
| Are you worried you may face eviction? | - Yes - No |
| Are you the primary caretaker of someone who is disabled or elderly? | - Yes - No |
| Do you have childcare responsibilities that make your medical care challenging? | - Yes - No |
| Are you experiencing or have you recently experienced physical or emotional abuse from a partner? | - Yes - No |
| Would you like to talk to a mental health professional for any reason? (such as depression, feeling overwhelmed with diagnosis, etc.) | - Yes - No |
| Psychosocial needs comment |  |
|  | |
| **Smoking status** |  |
| Does the patient currently smoke? (cigarettes only) | - Yes - No |
| If the patient is currently smoking cigarettes, is the patient interested in referral to smoking cessation? | - Yes - No - Not applicable |
| Smoking comments |  |

**While this question was initially framed to ask about laptop computers, the navigator modified it to tablets/iPads® prior to program initiation as the budget only allowed for iPads®.*
